# Supplementary material
Source: PubMed Central journal article supplement (PMC4237163)
Supplement: NIHMS636919-supplement-supplementary_info.pdf [file NIHMS636919-supplement-supplementary_info.pdf]

## **Supplementary Material for *RNA-Guided Nucleases as Programmable-Spectrum Antimicrobials and Microbial Population Sculptors***

### **Supplementary Discussion**

Phage-based therapies are dependent on their ability to deliver nucleic acids into bacteria, which can be resisted through a variety of mechanisms<sup>1</sup>. These delivery vehicles can be limited to a subset of bacteria defined by the chosen phage, such that the design of programmable antimicrobials may require additional considerations as to the phage platform chosen. However, rational modification to phage host range through tail fiber alterations<sup>2</sup> or the use of bacteriophage cocktails<sup>3</sup> can mitigate the host range limitations of phage-based therapies. Although the use of bacteriophages in humans has been met with challenges<sup>3</sup>, especially in the Western world, a renaissance in phage-based therapeutics has begun to address these challenges, such as demonstrating safety in humans<sup>4</sup>, improving the persistence of phages remaining in circulation by reducing their clearance by the host<sup>5</sup> and minimizing endotoxin release by using non-lytic phage engineered with heterologous kill functions<sup>6</sup>. Additionally, we devised a complementary delivery strategy using a mobilizable broad-host-range system to introduce RGNs to recipient cells via conjugation. The use of conjugative delivery from probiotics into target bacteria would enable a platform where engineered cells could integrate complex environmental cues and execute lethal payload delivery, akin to previously described sentinel cells<sup>7</sup>. Future work is needed to improve the efficiency and spectra of delivery strategies for RGNs, which may include broad-host-range bacteriophages and more efficient conjugative strategies, as well as chemical delivery technologies.

Supplementary Figures

Supplementary Figure 1

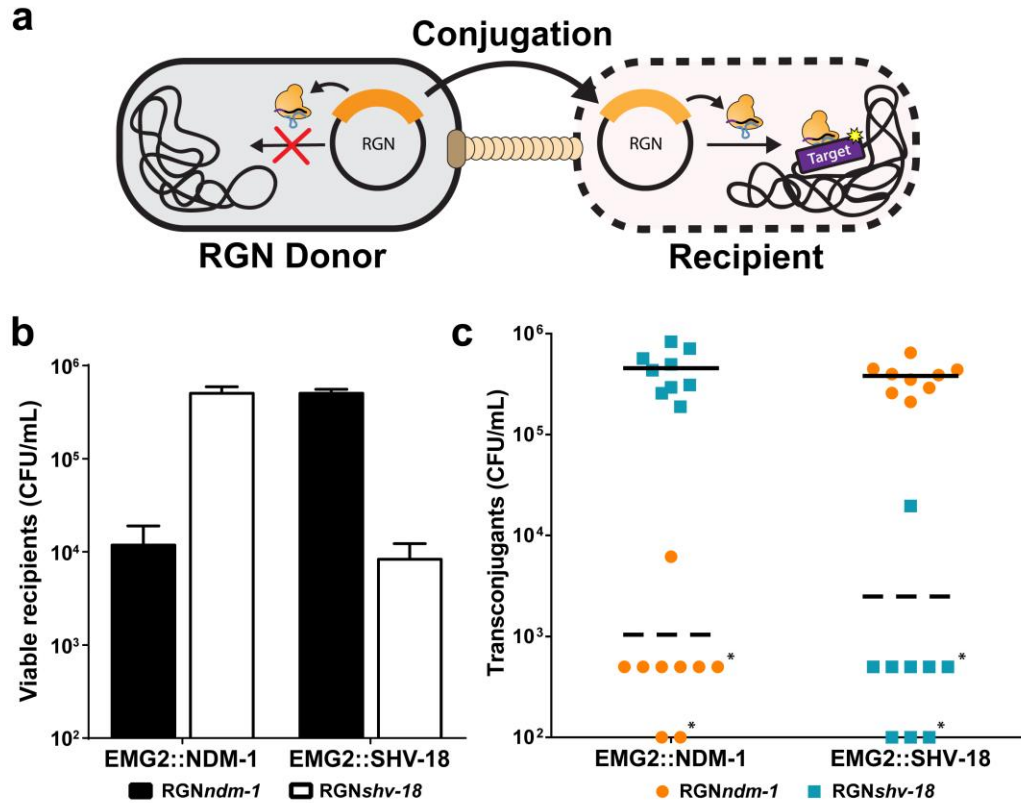

**Supplementary Figure 1: Mobilizable RNA-guided nucleases (RGNs) can be conjugated into target bacteria for selective removal of multidrug resistance.** (a) Schematic of mobilizable RGN-mediated cell killing. (b-c) S17-1  $\lambda$ pir donor cells possessing RGN $ndm-1$  or RGN $shv-18$  were mated at a donor:recipient ratio of  $340 \pm 66:1$  for 3 hours with EMG2 recipient cells that contain  $bla_{NDM-1}$  (EMG2::NDM-1) or  $bla_{SHV-18}$  (EMG2::SHV-18) integrated into the chromosome. Cultures were plated on LB + carbenicillin (Cb) to select for surviving recipient cells (b) and LB + chloramphenicol (Cm) + Cb to select for transconjugants (c) (Cm resistance is encoded by the RGN plasmids). (c) Transfer of a mobilizable RGN into cells containing the cognate target sequence (dashed line) reduced the number of viable transconjugants to the limit of detection (\*) (100 CFU/mL or 500 CFU/mL for three or six of the biological replicates, respectively) in almost all cases. Error bars indicate s.e.m. of three independent experiments, each with three biological replicates (n=9).

## Supplementary Figure 2

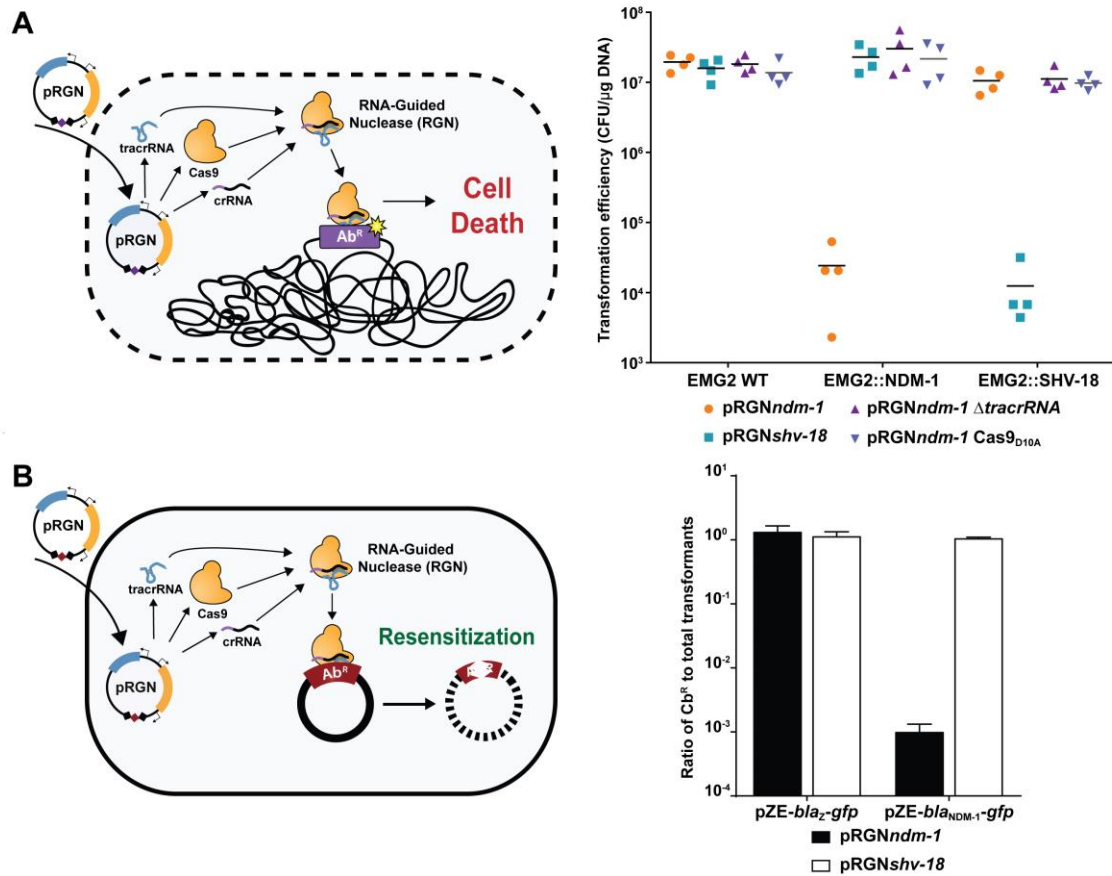

**Supplementary Figure 2: Design and validation of programmable RGN constructs.** (A) Plasmids pRGN<sub>Ndm-1</sub>, pRGN<sub>shv-18</sub>, pRGN<sub>Ndm-1</sub>  $\Delta$ tracrRNA, and pRGN<sub>Ndm-1</sub> Cas9<sub>D10A</sub> were transformed into competent wild-type EMG2 (EMG2 WT) as well as otherwise isogenic strains containing chromosomally integrated *bla<sub>NDM-1</sub>* (EMG2::NDM-1) or *bla<sub>SHV-18</sub>* (EMG2::SHV-18). Transformants were enumerated on LB+chloramphenicol (Cm) to select for pRGN transformants and to determine transformation efficiencies, which demonstrated the specific incompatibility of an RGN construct and its cognate protospacer (n=4). (B) Plasmids pRGN<sub>Ndm-1</sub> and pRGN<sub>shv-18</sub> were transformed into EMG2 cells containing either pZE-*bla<sub>NDM-1</sub>-gfp* or pZE-*bla<sub>Z</sub>-gfp* plasmids. Transformants, first selected in appropriate antibiotic media, were enumerated on LB+Cm or LB+Cm+carbenicillin (Cb) agar to calculate the ratio of transformants retaining Cb resistance (Cb<sup>R</sup>) to total transformants. Error bars indicate s.e.m. of three independent experiments, each with three biological replicates (n=9).

### Supplementary Figure 3

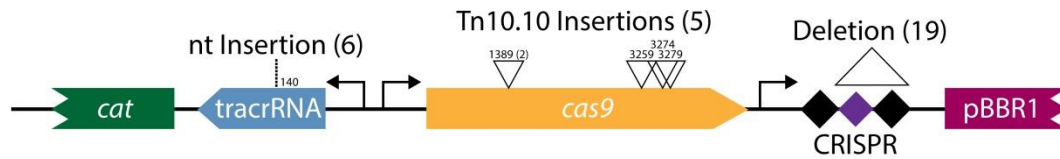

| Mutation                                   | Number | %    |
|--------------------------------------------|--------|------|
| Deletion of spacer and one repeat          | 19     | 63.3 |
| <i>tracrRNA</i> Insertion (A at nt140/141) | 6      | 20.0 |
| Transposon Insertion (Tn10.10)             | 5      | 16.7 |

**Supplementary Figure 3: Characterization of escape mutants that tolerated transformation of a cytotoxic RGN construct.** EMG2::NDM-1 or EMG2::SHV-18 colonies that tolerated transformation of the pRGN $ndm-1$  or pRGN $shv-18$  plasmids (Supplementary Fig. 2b) were re-isolated and sequenced to identify escape mutations. Spacer deletion in the CRISPR locus, point mutations in *tracrRNA* and transposon insertions in *cas9* led to pRGN inactivation in successful transformants. Five escape mutants from three independent experiments were sequenced per strain (n=30).

Supplementary Figure 4

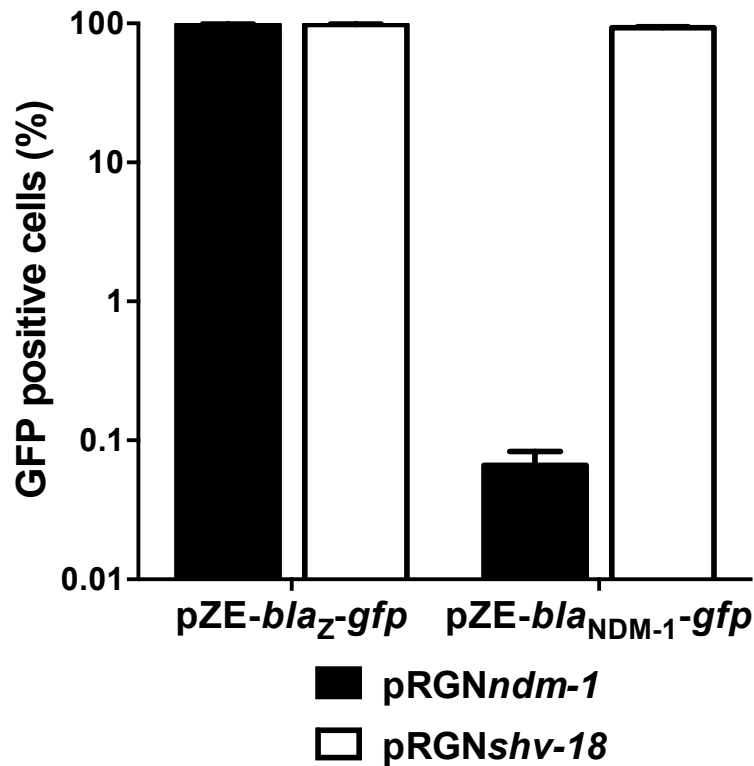

**Supplementary Figure 4: Transformation of pRGNndm-1 leads to loss of a high-copy GFP-expressing plasmid as evidenced by flow cytometry.** EMG2 cells containing either pZE-*bla<sub>Z</sub>*-gfp or pZE-*bla<sub>NDM-1</sub>*-gfp plasmids were transformed with pRGNndm-1 or pRGNshv-18 plasmids and transformants were selected overnight in LB+chloramphenicol (no selection for *bla* was applied). Plasmid loss was determined by calculating the percentage of GFP-positive cells following gating by forward and side scatter. Error bars indicate s.e.m. of measurements from three independent experiments, each with three biological replicates (n=9).

### Supplementary Figure 5

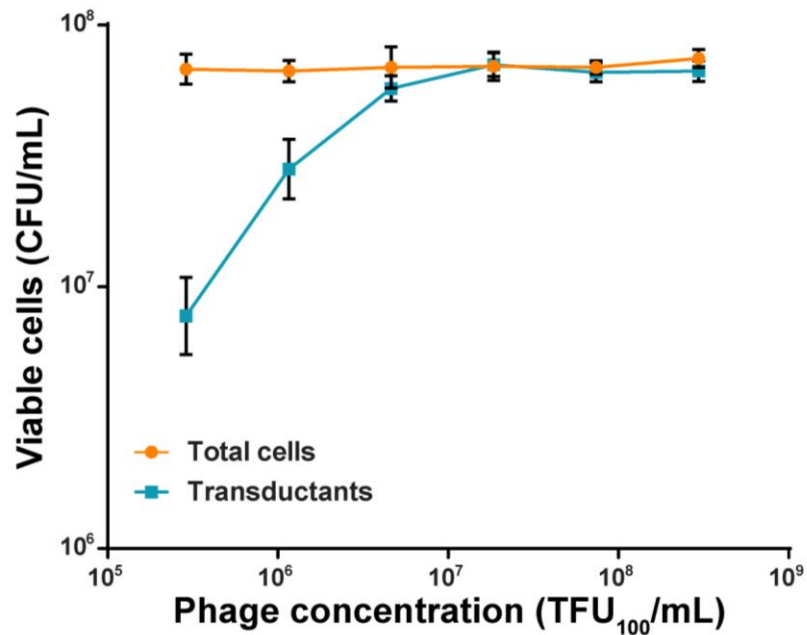

**Supplementary Figure 5: Titrating delivery of  $\Phi$ RGN $ndm-1$ .** Approximately  $6.5 \times 10^6$  CFU/mL of EMG2 wild-type cells were incubated with dilutions of  $\Phi$ RGN $ndm-1$  phagemid for 2 hours and plated onto LB and LB+kanamycin to determine the highest dilution of the purified  $\Phi$ RGN stock able to transduce approximately 100% of the recipient cell population (defined as TFU<sub>100</sub>/mL). The  $\Phi$ RGN $ndm-1$  phagemid encodes a kanamycin resistance gene. Error bars indicate s.e.m. of three independent experiments (n=3).

### Supplementary Figure 6

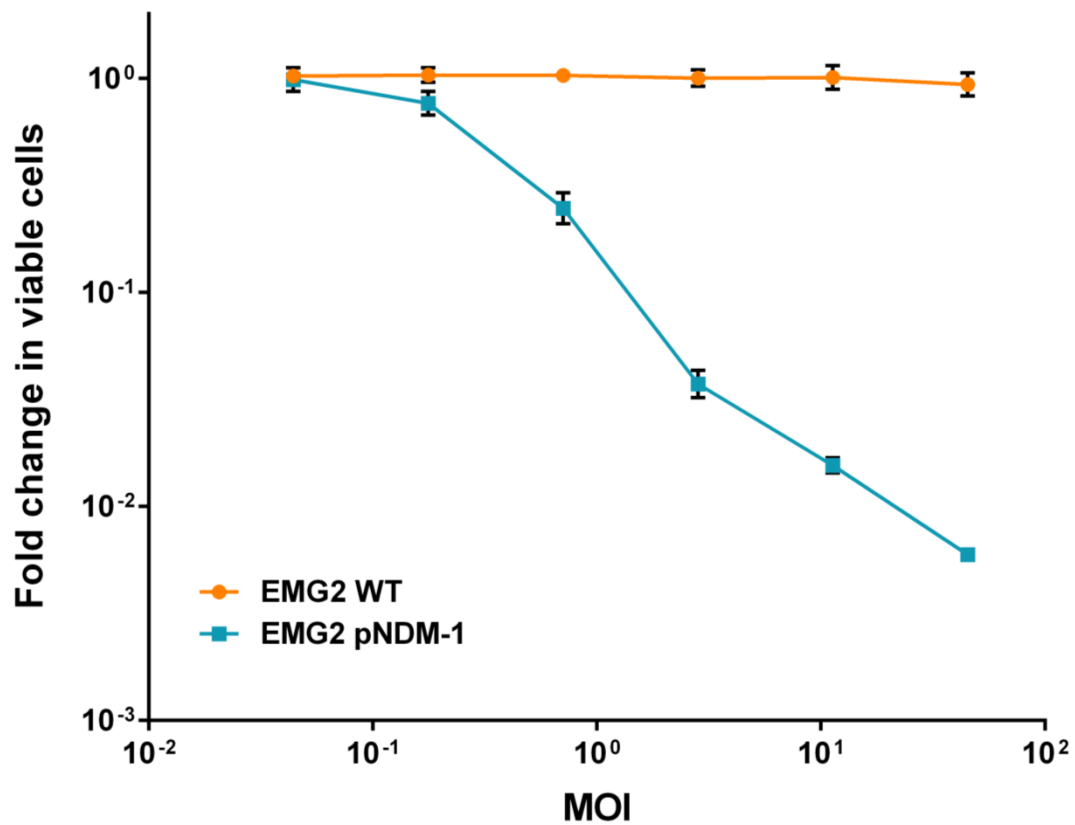

### Supplementary Figure 6: Dose response of target cells to $\Phi$ RGN $ndm-1$ .

Approximately  $6.5 \times 10^6$  CFU/mL of EMG2 wild-type (WT) or EMG2 pNDM-1 cells were treated with increasing concentrations of  $\Phi$ RGN $ndm-1$  particles for two hours. Viable cells were determined by plating onto non-selective LB agar. Error bars indicate s.e.m. of three independent experiments (n=3). MOI=multiplicity of infection.

## Supplementary Figure 7

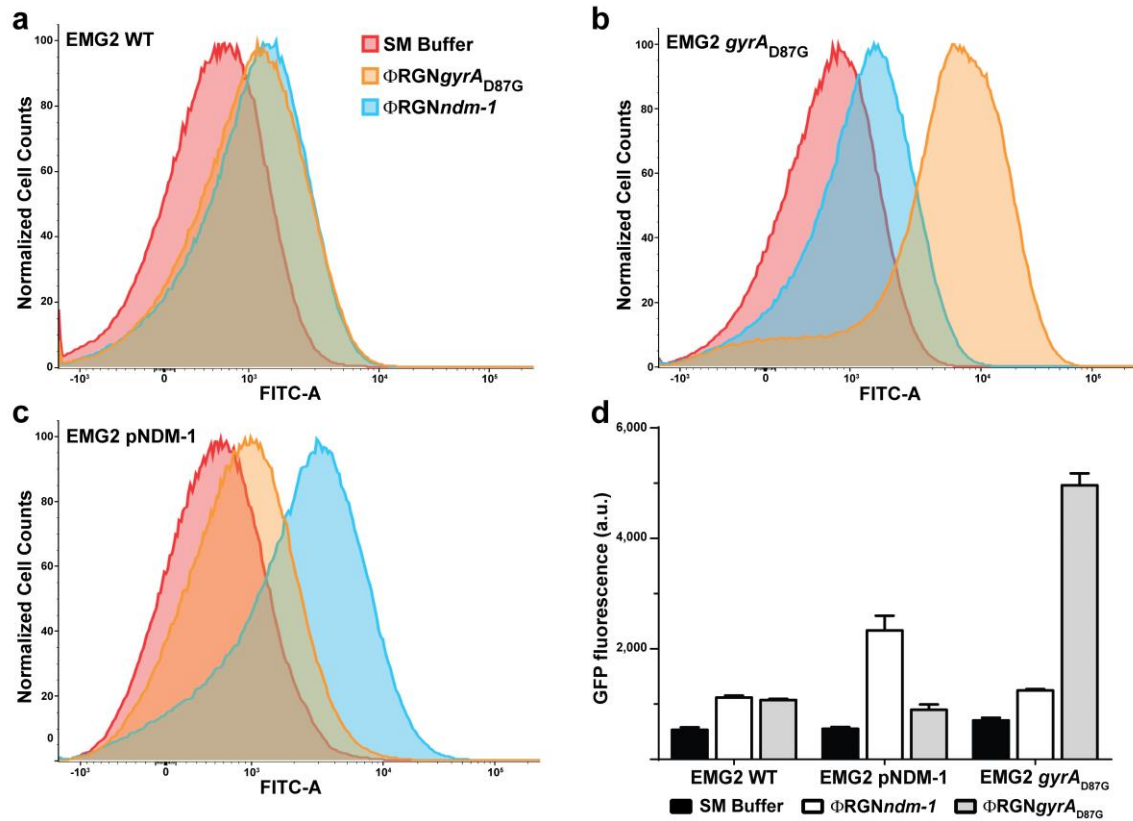

**Supplementary Figure 7: Treatment of *E. coli* with  $\Phi$ RGNs induces DNA damage and an SOS response in cells that possess a cognate target sequence.** EMG2 wild-type (WT) (a), EMG2  $gyrA_{D87G}$  (b) and EMG2 pNDM-1 (c) containing the pZA3LG reporter plasmid were treated with either SM buffer,  $\Phi$ RGN $ndm-1$  or  $\Phi$ RGN $gyrA_{D87G}$ . GFP expression on pZA3LG is under the control of the SOS-responsive  $P_{L(\text{lexO})}$  promoter<sup>8</sup>. Injection of single-stranded phagemid DNA led to a mild induction of the SOS response, whereas RGN activity in cells that possessed a cognate target sequence led to stronger induction of SOS. Histograms were generated by combining data from four biological replicates and are normalized to the mode of the population. (d) Summary of flow cytometry histograms. The arithmetic means of the geometric mean fluorescence of populations in a–c were calculated across four independent biological replicates (n=4). Error bars represent s.e.m.



### Supplementary Figure 8

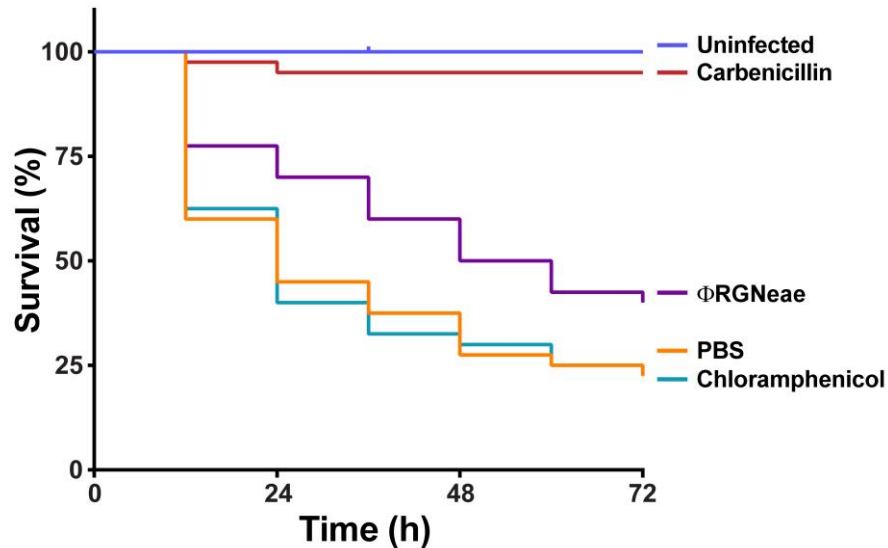

**Supplementary Figure 8: Comparison of  $\Phi$ RGNeae to conventional antibiotic treatment of EHEC-infected *Galleria mellonella* larvae.** *G. mellonella* larvae (n=40) were injected with PBS or approximately  $3 \times 10^5$  colony forming units (CFU) of enterohemorrhagic *E. coli* (EHEC). Larvae were subsequently treated with PBS,  $\Phi$ RGNeae at MOI~30, chloramphenicol or carbenicillin. The antibiotics were both applied at a concentration of ~32mg/kg, corresponding to the CLSI resistance breakpoints for Enterobacteriaceae ( $32 \mu\text{g/mL}$ )<sup>9</sup>. The minimum inhibitory concentration (MIC) values for the EHEC strain are  $4 \mu\text{g/mL}$  and  $>64 \mu\text{g/mL}$  for carbenicillin and chloramphenicol, respectively (Supplementary Table 1). Administration of  $\Phi$ RGNeae significantly improved survival compared to untreated and chloramphenicol treated larvae (Log-rank test,  $p < 0.05$ ).

## Supplementary Tables

**Supplementary Table 1: Minimum Inhibitory Concentration (MIC) ( $\mu\text{g/mL}$ )**

| Strain                           | AMP | CAZ  | CTX           | IPM  | OFX   | CIP            | GEN | CAR | CHL |
|----------------------------------|-----|------|---------------|------|-------|----------------|-----|-----|-----|
| EMG2 Wild-Type                   | 2   | 0.25 | $\leq 0.0625$ | 0.25 | 0.125 | $\leq 0.03125$ | 4   | ND  | ND  |
| EMG2 <i>gyrA</i> <sub>D87G</sub> | 4   | 0.25 | $\leq 0.0625$ | 0.25 | 0.5   | 0.125          | 4   | ND  | ND  |
| EMG2 pNDM-1                      | >64 | >64  | >64           | 32   | 0.125 | $\leq 0.03125$ | >64 | ND  | ND  |
| EMG2 pSHV-18                     | 64  | 1    | 0.25          | 0.25 | 0.125 | $\leq 0.03125$ | >64 | ND  | ND  |
| ATCC43888 F' (EHEC)              | 4   | ND   | ND            | ND   | ND    | $\leq 0.03125$ | 8   | 4   | >64 |

AMP=ampicillin; CAZ=ceftazidime; CTX=cefotaxime; IPM=imipenem; OFX=ofloxacin;  
CIP=ciprofloxacin; GEN=gentamicin; CAR=carbenicillin; CHL=chloramphenicol; ND=Not Determined

**Supplementary Table 2: Bacterial Strains and Plasmids Used in This Study**

| Identifier               | Strain/Plasmid                                  | Relevant Features                                                                                              | Source/Reference                       |
|--------------------------|-------------------------------------------------|----------------------------------------------------------------------------------------------------------------|----------------------------------------|
| <b>Bacterial Strains</b> |                                                 |                                                                                                                |                                        |
| fRC149                   | <i>Escherichia coli</i> EMG2                    | F <sup>+</sup>                                                                                                 | CGSC #4401                             |
| fMM28                    | <i>E. coli</i> CJ236                            | F $\Delta$ ( <i>HindIII</i> )::cat (Tra <sup>+</sup> Pil <sup>+</sup> Cm <sup>R</sup> )                        | NEB #E4141S                            |
| fMM194                   | <i>E. coli</i> RFS289                           | F', <i>gyrA</i> <sub>D87G</sub> (Ofx <sup>R</sup> )                                                            | CGSC #5742                             |
| fMM269                   | <i>E. coli</i> EMG2::NDM-1                      | EMG2 $\Delta$ <i>lacZYA</i> :: <i>bla</i> <sub>NDM-1</sub>                                                     | this study                             |
| fMM268                   | <i>E. coli</i> EMG2::SHV-18                     | EMG2 $\Delta$ <i>lacZYA</i> :: <i>bla</i> <sub>SHV-18</sub>                                                    | this study                             |
| fMM384                   | <i>E. coli</i> EMG2 <i>gyrA</i> <sub>D87G</sub> | EMG2 <i>gyrA</i> <sub>D87G</sub> (Ofx <sup>R</sup> )                                                           | this study                             |
| fRC275                   | <i>E. coli</i> EMG2 Sm <sup>R</sup>             | EMG2 <i>rpsL</i> <sub>K43N</sub> (Sm <sup>R</sup> )                                                            | this study                             |
| fRC301                   | <i>E. coli</i> DH5 $\alpha$ PRO                 | M13cp                                                                                                          | Chasteen <i>et al.</i>                 |
| fMM425                   | <i>E. coli</i> CDC1001728                       | pNDM-1                                                                                                         | 2006 <sup>10</sup>                     |
| fMM278                   | <i>E. coli</i> S17-1 $\lambda$ <i>pir</i>       | RP4-2-Tc::Mu-Km::Tn7                                                                                           | ATCC BAA-2469                          |
| fMM362                   | <i>E. coli</i> EMG2 pNDM-1                      | pNDM-1 from ATCC BAA-2469                                                                                      | Simon <i>et al.</i> 1983 <sup>11</sup> |
| fMM426                   | <i>Klebsiella pneumoniae</i> K6                 | pSHV-18                                                                                                        | this study                             |
| fRC280                   | <i>E. coli</i> EMG2 pSHV-18                     | pSHV-18 from ATCC #700603                                                                                      | ATCC #700603                           |
| fMM427                   | <i>E. coli</i> O157:H7 43888                    | <i>eae</i> <sup>+</sup>                                                                                        | this study                             |
| fMM428                   | <i>E. coli</i> O157:H7 43888 F'                 | F' from CJ236                                                                                                  | ATCC #43888                            |
| <b>RGN Plasmids</b>      |                                                 |                                                                                                                |                                        |
| pMM178                   | pRGN <i>ndm-1</i>                               | Cm <sup>R</sup> , crRNA targeting <i>bla</i> <sub>NDM-1</sub>                                                  | this study                             |
| pMM282                   | pRGN <i>ndm-1</i> (Cas9D10A)                    | Cm <sup>R</sup> , RGN <i>ndm-1</i> ( <i>cas9</i> mutation)                                                     | this study                             |
| pMM281                   | pRGN <i>ndm-1</i> ( $\Delta$ <i>tracrRNA</i> )  | Cm <sup>R</sup> , RGN <i>ndm-1</i> (deleted <i>tracrRNA</i> deletion)                                          | this study                             |
| pMM228                   | pRGN <i>shv-18</i>                              | Cm <sup>R</sup> , crRNA targeting <i>bla</i> <sub>SHV-18</sub>                                                 | this study                             |
| pMM417                   | mRGN <i>shv-18</i>                              | Cm <sup>R</sup> , Mobilizable RGN <i>shv-18</i>                                                                | this study                             |
| pMM441                   | mRGN <i>ndm-1</i>                               | Cm <sup>R</sup> , Mobilizable RGN <i>ndm-1</i>                                                                 | this study                             |
| <b>RGN Phagemids</b>     |                                                 |                                                                                                                |                                        |
| pRC319                   | p $\Phi$ RGN <i>ndm1</i>                        | Km <sup>R</sup> , crRNA targeting <i>bla</i> <sub>NDM-1</sub>                                                  | this study                             |
| pRC321                   | p $\Phi$ RGN <i>shv18</i>                       | Km <sup>R</sup> , crRNA targeting <i>bla</i> <sub>SHV-18</sub>                                                 | this study                             |
| pRC323                   | p $\Phi$ RGN <i>ndm1/shv18</i>                  | Km <sup>R</sup> , crRNA targeting <i>bla</i> <sub>NDM-1</sub> and crRNA targeting <i>bla</i> <sub>SHV-18</sub> | this study                             |
| pRC320                   | p $\Phi$ RGN <i>gyrA</i> <sub>D87G</sub>        | Km <sup>R</sup> , crRNA targeting <i>gyrA</i> <sub>D87G</sub>                                                  | this study                             |
| pRC357                   | p $\Phi$ RGN <i>eae</i>                         | Km <sup>R</sup> , crRNA targeting <i>eae</i>                                                                   | this study                             |

|                   |                                               |                                                                                 |                                        |
|-------------------|-----------------------------------------------|---------------------------------------------------------------------------------|----------------------------------------|
| Clinical Plasmids |                                               |                                                                                 |                                        |
| pMM425            | pNDM-1                                        | <i>bla</i> <sub>NDM-1</sub> , multidrug resistance                              | ATCC BAA-2469                          |
| pMM426            | pSHV-18                                       | <i>bla</i> <sub>SHV-18</sub> , <i>pemIK</i> , multidrug resistance              | ATCC #700603                           |
| Other Plasmids    |                                               |                                                                                 |                                        |
| pRC218            | pMJ806 (Addgene 39312)                        | encodes Cas9 from <i>S. pyogenes</i>                                            | Jinek <i>et al.</i> 2012 <sup>12</sup> |
| pMM153            | pZE- <i>bla</i> <sub>Z</sub> - <i>gfp</i>     | ColE1 <i>gfp</i> control plasmid, Cb <sup>R</sup>                               | Lutz <i>et al.</i> 1997 <sup>13</sup>  |
| pMM234            | pZE- <i>bla</i> <sub>NDM-1</sub> - <i>gfp</i> | ColE1 <i>bla</i> <sub>NDM-1</sub> , <i>gfp</i>                                  | this study                             |
| pMM154            | pZA- <i>bla</i> <sub>Z</sub> - <i>gfp</i>     | p15A <i>gfp</i> control plasmid, Cb <sup>R</sup>                                | Lutz <i>et al.</i> 1997 <sup>13</sup>  |
| pMM235            | pZA- <i>bla</i> <sub>NDM-1</sub> - <i>gfp</i> | p15A <i>bla</i> <sub>NDM-1</sub> , <i>gfp</i>                                   | this study                             |
| pMM253            | pSIM9                                         | recombineering machinery, Cm <sup>R</sup>                                       | Datta <i>et al.</i> 2006 <sup>14</sup> |
| pRC306            | pZef- <i>gfp</i>                              | phagemid vector, Cm <sup>R</sup>                                                | this study                             |
| pMM395            | pZA31- <i>gfp</i>                             | p15A <i>gfp</i> control plasmid, Cm <sup>R</sup>                                | Lutz <i>et al.</i> 1997 <sup>13</sup>  |
| pMM398            | pZA31- <i>pemI</i>                            | p15A <i>pemI</i> expression plasmid, Cm <sup>R</sup>                            | this study                             |
| pMM444            | pZE1LG                                        | ColE1 P <sub>L(lexO)</sub> - <i>gfp</i> SOS-responsive plasmid, Cb <sup>R</sup> | Dwyer <i>et al.</i> 2007 <sup>8</sup>  |
| pMM447            | pZA3LG                                        | p15a P <sub>L(lexO)</sub> - <i>gfp</i> SOS-responsive plasmid, Cm <sup>R</sup>  | this study                             |
| pMM364            | R1162                                         | Mobilizable wild-type plasmid                                                   | Richard Meyer                          |

Abbreviations: Carbenicillin (Cb); Chloramphenicol (Cm); Kanamycin (Km); Ofloxacin (Ofx); Streptomycin (Sm)

### Supplementary Table 3: Primers and Oligos Used in this Study

| Identifier | Name             | Sequence                                                                                         |
|------------|------------------|--------------------------------------------------------------------------------------------------|
| Primers    |                  |                                                                                                  |
| mmD3       | SHV18-Chk-F      | ATGCGTTATTTTCGCCTGTGTA                                                                           |
| mmD4       | SHV-18-Chk-R     | TTAGCGTTGCCAGTGCTCG                                                                              |
| mmD8       | pNDM1-XhoI-F     | CATGCGCTCGAGGCTCAGCTTGTGATTATCATATG                                                              |
| mmD9       | NDM1-SacI-R      | CATAAGGAGCTCTCAGCGCAGCTTGTCGGCCA                                                                 |
| mmD74      | GpLtetO-SpCas9-F | CACTGACCGAATTCATTAAGAGGAGAAAGGTGCGGCC<br>GCATGCATCACCATCACCATCACATGGATAAGAAATAC<br>TCAATAGGCTTAG |
| mmD75      | GT1-SpCas9-R     | TTCGACTGAGCCTTTCGTTTTATTTGATGCCTCTAGTCA<br>GTCACCTCCTAGCTGACTCAA                                 |
| mmD82      | GSpCRISPR-T1-F   | TATGCTGTTTTGAATGGTCTCCATTCTCTAGAGGCATCA<br>AATAAAACGAAAGGCTCAGT                                  |
| mmD83      | GSpracrRNA-amp-R | AACCAAAAAACAAGCGCTTTCAAACGCGTCGACAG<br>GGTGAAGACGAAAGGGCCTCGTG                                   |
| mmD98      | mmS1-F           | CTATAAAATAGGCGTATCACGAGGCC                                                                       |
| mmD99      | mmS1-R           | TTGAGTATTTCTTATCCATGTGATGGTGATGG                                                                 |
| mmD104     | GGSpySpacer-F    | GAGCATGAAGACCATTCAGCACACTGAGACTTGTTGAG<br>TTC                                                    |
| mmD105     | GGSpySpacer-R    | GAGCATGAAGACCCCTCGCTCGTAGACTATTTTTGTCTA<br>AAAAATTTTCGT                                          |
| mmD108     | SpyCas9D10A-F    | GCTATCGGCACAAATAGCGTCGGATG                                                                       |
| mmD109     | SpyCas9D10A-R    | TAAGCCTATTGAGTATTTCTTATCCATCGAGG                                                                 |
| mmD112     | Cas9-400-Chk-R   | GATAGATAGTTGGATATTTCTCATGATAAG                                                                   |

|        |                            |                                                                                             |
|--------|----------------------------|---------------------------------------------------------------------------------------------|
| mmD113 | Cas9-900-Chk-F             | CTGAAATAACTAAGGCTCCCCTATC                                                                   |
| mmD114 | Cas9-1.8K-Chk-F            | GATAGGGAGATGATTGAGGAAAGAC                                                                   |
| mmD115 | Cas9-2.8K-Chk-F            | CGCATGAATACTAAATACGATGAAAATG                                                                |
| mmD151 | NheI-tL17pBBR1-SpyCRISPR-F | CATGATGCTAGCACCTGCAGAGCTTCTAGATGATGAT<br>TAAGGATCTATTTTTTTGGGCG                             |
| mmD153 | Cas9-End-Chk-F             | GTGCATATAACAAACATAGAGAC                                                                     |
| mmD154 | Lutz-BtwAbProm-R           | CCTCGTGATACGCCTATTTTTATAGGTTAATG                                                            |
| mmD155 | gyrA-F                     | CACCACTCATTGCCACATTCCCTTGTG                                                                 |
| mmD161 | gyrA-R                     | CGGCTTCAAATTTAGCGATCTCTTC                                                                   |
| mmD162 | notracrRNA-ClaI-F          | ATCGATATCGATTCCCTATCAGTGATAGAGATTGAC                                                        |
| mmD163 | notracrRNA-ClaI-R          | CATGATATCGATAGGGTGAAGACGAAAGGGCCTCG                                                         |
| mmD234 | NDM-1-Start-F              | GATGGAATTGCCCAATATTATGCACCC                                                                 |
| mmD247 | SpeI-catCRISPR-F           | CACTCATCGCAGTCGGCCTATTGG                                                                    |
| mmD248 | XmaI-catCRISPR-R           | CATGATcccgggGGACAGCAAGCGAACCATTTTTTTGGG                                                     |
| mmD253 | KpnI-pemI-F                | CATGATGGTACCATGCATACCACTCGACTGAAGAAGGT<br>TG                                                |
| mmD254 | BamHI-pemI-R               | CATGATGGATCCTCAGATTTCCCTCCTGACCAGCCG                                                        |
| mmD266 | XmaI-R1162-F               | catgatcccgggGACAGACGTCATACTAGATATCAAGCGAC                                                   |
| mmD267 | SpeI-R1162-R               | catgatactagtGGAGCAGAAGAGCATAACATCTGGAAG                                                     |
| rcD11  | cam-3-F                    | ACGTCTCATTTTTCGCCAGAT                                                                       |
| rcD73  | pSHV18-KIIacZYA-F          | GGCTTTACACTTTATGCTTCCGGCTCGTATGTTGTGTGG<br>AATTGTGAGCGGATAACAATTCTTTTGCTTTGCCACGGA<br>AC    |
| rcD74  | SHV18-KIIacZYA-R           | TTAAACTGACGATTCAACTTTATAATCTTTGAAATAATA<br>GTGCTTATCCCGTTCGTTTATCTACGAGCCGGATAACGC          |
| rcD77  | pNDM1-KIIacZYA-F           | GGCTTTACACTTTATGCTTCCGGCTCGTATGTTGTGTGG<br>AATTGTGAGCGGATAACAATTGCTCAGCTTGTGATTAT<br>CATATG |
| rcD78  | NDM1-KIIacZYA-R            | TTAAACTGACGATTCAACTTTATAATCTTTGAAATAATA<br>GTGCTTATCCCGTTCGTTTATTCAGCGCAGCTTGTCCGC<br>CA    |
| rcD169 | XmaI-CRISPR-R              | CATGATCCCGGGGTTTTATGGACAGCAAGCGAACC                                                         |
| rcD183 | AvrII-CRISPR-F             | CATGATCCTAGGCGTCTAAGAAACCATTATTATCATGA<br>CATTAAACC                                         |
| rcD184 | XmaI-pZefS-noGFP-F         | CATGATCCCGGGCAGAAGATCCTGCAGGGCCTTC                                                          |
| rcD185 | AvrII-pZefS-noGFP-R        | CATGATCCTAGGAAATTGTAAACGTTAATATTTGTAA<br>AATTCGC                                            |
| Oligos |                            |                                                                                             |
| mmO11  | SP-T-GG-Cap-1              | CATGAGGGTCTCACGAGGTTTTAGAGCTATGCTGTTTTG<br>AATGGTCCCAAAC                                    |
| mmO14  | SP-B-GGCap-5               | CATGAGGGTCTCCTGAAGTTTTGGGACCATTCAAACA<br>GCATAGCTCTAAAAC                                    |
| mmO17  | SP-T-ndm1-6                | GGGCAGTCGCTTCCAACGGTTTTGA                                                                   |
| mmO18  | SP-B-ndm1-6                | TGACGATCAAACCGTTGGAAGCGA                                                                    |
| mmO19  | SP-T-ndm1R-7               | TCGTCAGTTTTAGAGCTATGCTGTTTTGAATGGTCCCAA<br>AAC                                              |

|        |                   |                                                                 |
|--------|-------------------|-----------------------------------------------------------------|
| mmO20  | SP-B-Rshv18-2     | ATTTGCGTTTTGGGACCATTCAAACAGCATAGCTCTA<br>AAAC                   |
| mmO21  | SP-T-shv18-2      | GCAAATTAACACTAAGCGAAAGCCA                                       |
| mmO22  | SP-B-shv18-2      | GACAGCTGGCTTTCGCTTAGTTTA                                        |
| mmO23  | SP-T-shv18-2-3Cap | GCTGTCGTTTTAGAGCTATGCTGTTTTGAATGGTCCCAA<br>AACTTCAGGAGACCCTCATG |
| mmO58  | SP-B-ndm1-1-Cap5  | CTGCCCGTTTTGGGACCATTCAAACAGCATAGCTCTA<br>AAACCTCGTGAGACCCTCATG  |
| mmO59  | SP-T-ndm1-1-Cap3  | TCGTCAGTTTTAGAGCTATGCTGTTTTGAATGGTCCCAA<br>AACTTCAGGAGACCCTCATG |
| mmO87  | SP-B-gyrA111-Cap5 | TGGTATGTTTTGGGACCATTCAAACAGCATAGCTCTA<br>AAACCTCGTGAGACCCTCATG  |
| mmO88  | SP-T-gyrA111      | ATACCATCCCCATGGTGACTCGGG                                        |
| mmO89  | SP-B-gyrA111      | TAGACCGCCGAGTCACCATGGGGA                                        |
| mmO90  | SP-T-gyrA111-Cap3 | GGTCTAGTTTTAGAGCTATGCTGTTTTGAATGGTCCCAA<br>AACTTCAGGAGACCCTCATG |
| mmO92  | SP-B-shv18-2-Cap5 | ATTTGCGTTTTGGGACCATTCAAACAGCATAGCTCTA<br>AAACCTCGTGAGACCCTCATG  |
| mmO115 | ndm1-1-T          | TTCCAACGGTTTGATCGTCAGTTTTA                                      |
| mmO116 | ndm1-1-B          | TGACGATCAAACCGTTGGAAGCTAGC                                      |
| mmO121 | shv18-2-T         | CTAAGCGAAAGCCAGCTGTCGTTTTA                                      |
| mmO122 | shv18-2-B         | GACAGCTGGCTTTCGCTTAGGCTAGC                                      |
| mmO204 | SP-B-eae1-Cap5    | GAGTCAGTTTTGGGACCATTCAAACAGCATAGCTCTA<br>AAACCTCGTGAGACCCTCATG  |
| mmO205 | SP-T-eae1         | TGACTCCCGCTTTACGGCAAATTT                                        |
| mmO206 | SP-B-eae1         | GCACCTAAATTTGCCGTAAGCGG                                         |
| mmO207 | SP-T-eae1-Cap3    | AGGTGCGTTTTAGAGCTATGCTGTTTTGAATGGTCCCAA<br>AACTTCAGGAGACCCTCATG |

#### Supplementary Table 4: CRISPR Loci

| RGN                | Oligos (mmO---)                   |
|--------------------|-----------------------------------|
| RGN $ndm-1$        | 11/58, 17/18, 59/14               |
| RGN $shv-18$       | 11/92, 21/22, 23/14               |
| RGN $gyrA_{D87G}$  | 11/87, 88/89, 90/14               |
| RGN $ndm-1/shv-18$ | 11/58, 17/18, 19/20, 21/22, 23/14 |
| RGN $eae$          | 11/204, 205/206, 207/14           |

#### Supplementary References

1. Labrie, S. J., Samson, J. E. & Moineau, S. Bacteriophage resistance mechanisms. *Nat. Rev. Microbiol.* **8**, 317–27 (2010).
2. Lin, T.-Y. *et al.* A T3 and T7 recombinant phage acquires efficient adsorption and a broader host range. *PLoS One* **7**, e30954 (2012).

3. Abedon, S. T., Kuhl, S. J., Blasdel, B. G. & Kutter, E. M. Phage treatment of human infections. *Bacteriophage* **1**, 66–85 (2011).
4. Bruttin, A. & Brüßow, H. Human volunteers receiving *Escherichia coli* phage T4 orally: a safety test of phage therapy. *Antimicrob. Agents Chemother.* **49**, 2874–8 (2005).
5. Merrill, C. R. *et al.* Long-circulating bacteriophage as antibacterial agents. *Proc. Natl. Acad. Sci. U. S. A.* **93**, 3188–92 (1996).
6. Hagens, S. & Bläsi, U. Genetically modified filamentous phage as bactericidal agents: a pilot study. *Lett. Appl. Microbiol.* **37**, 318–23 (2003).
7. Saeidi, N. *et al.* Engineering microbes to sense and eradicate *Pseudomonas aeruginosa*, a human pathogen. *Mol. Syst. Biol.* **7**, 521 (2011).
8. Dwyer, D. J., Kohanski, M. A., Hayete, B. & Collins, J. J. Gyrase inhibitors induce an oxidative damage cellular death pathway in *Escherichia coli*. *Mol Syst Biol* **3**, (2007).
9. Clinical and Laboratory Standards Institute. *M100-S23 Performance Standards for Antimicrobial Susceptibility Testing; Twenty-Third Informational Supplement*. 44–49 (2013).
10. Chasteen, L., Ayriss, J., Pavlik, P. & Bradbury, A. R. M. Eliminating helper phage from phage display. *Nucleic Acids Res.* **34**, e145 (2006).
11. Simon, R., Priefer, U. & Pühler, A. A broad host range mobilization system for *in vivo* genetic engineering: transposon mutagenesis in Gram negative bacteria. *Nat. Biotechnol.* **1**, 784–791 (1983).
12. Jinek, M. *et al.* A programmable dual-RNA-guided DNA endonuclease in adaptive bacterial immunity. *Science* **337**, 816–21 (2012).
13. Lutz, R. & Bujard, H. Independent and tight regulation of transcriptional units in *Escherichia coli* via the LacR/O, the TetR/O and AraC/I1-I2 regulatory elements. *Nucleic Acids Res.* **25**, 1203–10 (1997).
14. Datta, S., Costantino, N. & Court, D. L. A set of recombineering plasmids for gram-negative bacteria. *Gene* **379**, 109–15 (2006).
